# Supplementary material
Source: MDPI journal article supplement (https://www.mdpi.com/2504-477X/4/1/25)
Supplement: s1 [file s1]

**Supporting Information: Structure and dielectric properties of electroactive tetraaniline grafted non-polar elastomers**

Christopher Ellingford, Atcharaporn Pengchaicharoen, Alan Wemyss and Chaoying Wan *

**I**nternational Institute for Nanocomposites Manufacturing (IINM), WMG, University of Warwick, CV4 7AL, UK; [C.Ellingford@warwick.ac.uk](javascript:void(0);) (C.E.); [atcharpe@scg.com](javascript:void(0);) (A.P.); [A.Wemyss@warwick.ac.uk](javascript:void(0);) (A.W.)

***** Correspondence: Chaoying.wan@warwick.ac.uk


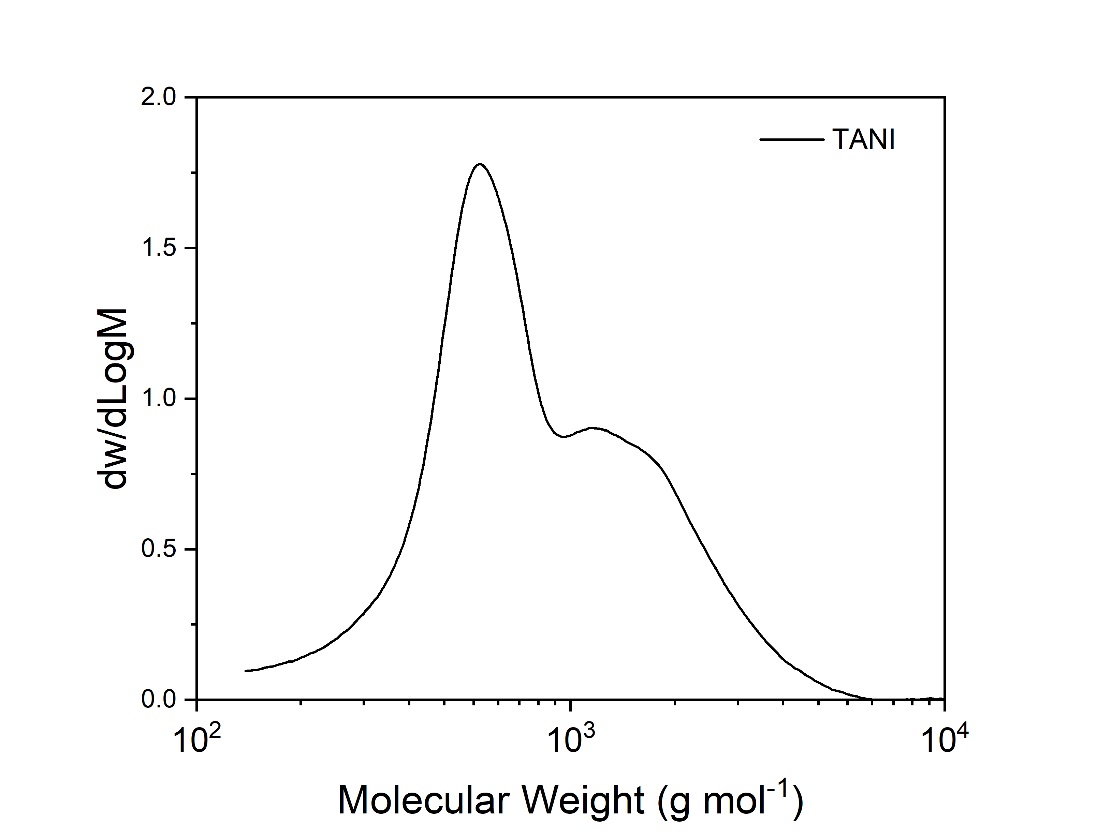


**F**igure S1. GPC trace from the synthesis of TANI.


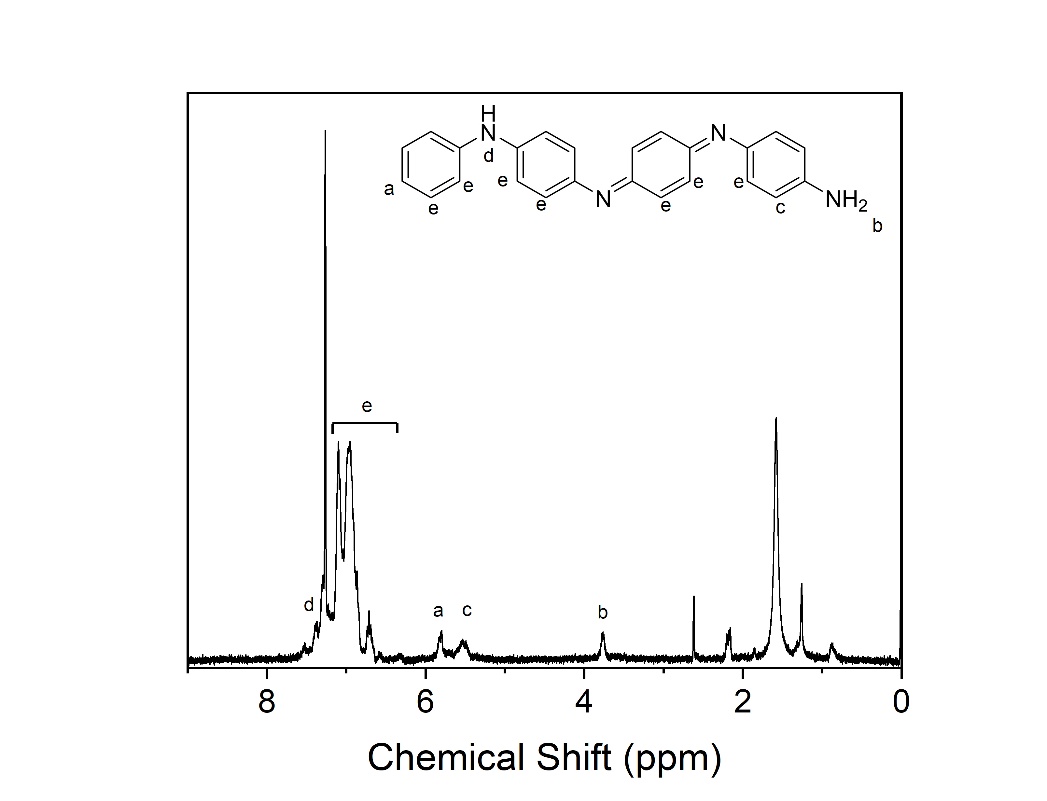


**F**igure S2. 1H NMR with assigned peaks of TANI.


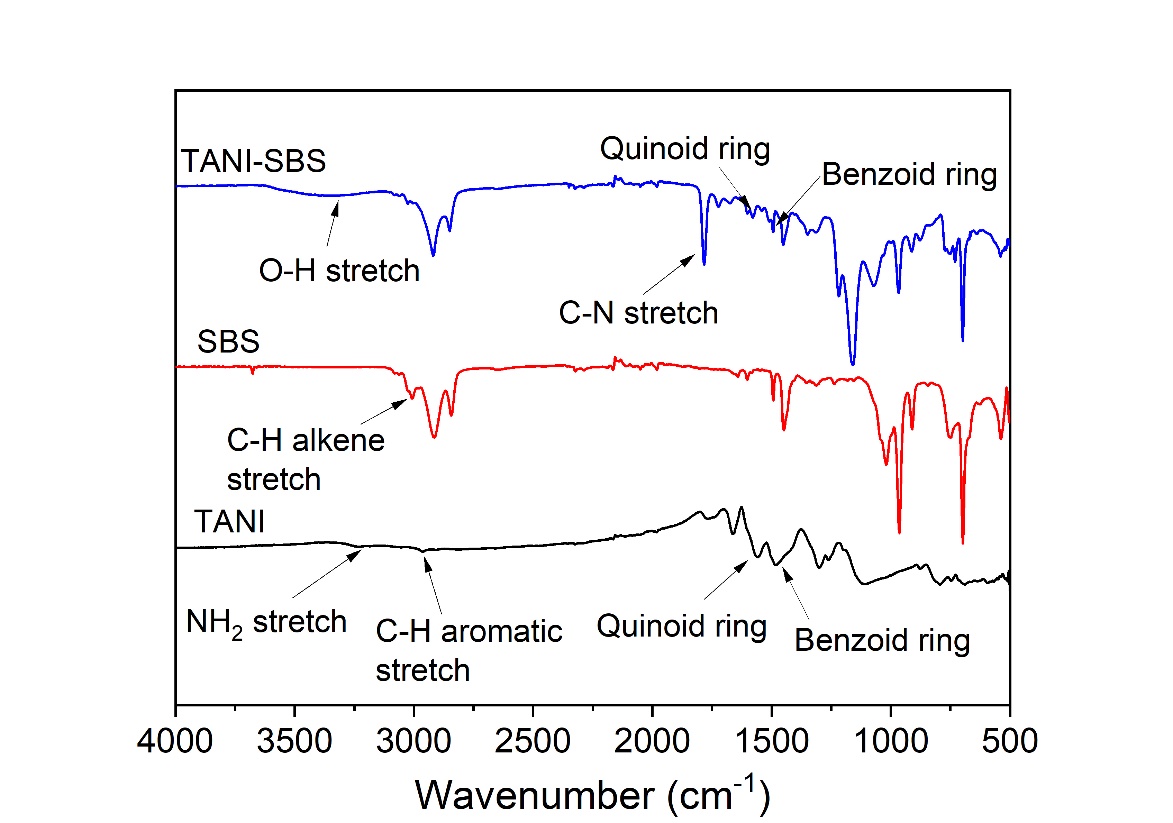


**F**igure S3. FTIR of TANI, SBS and TANI-SBS with notable peaks highlighted.


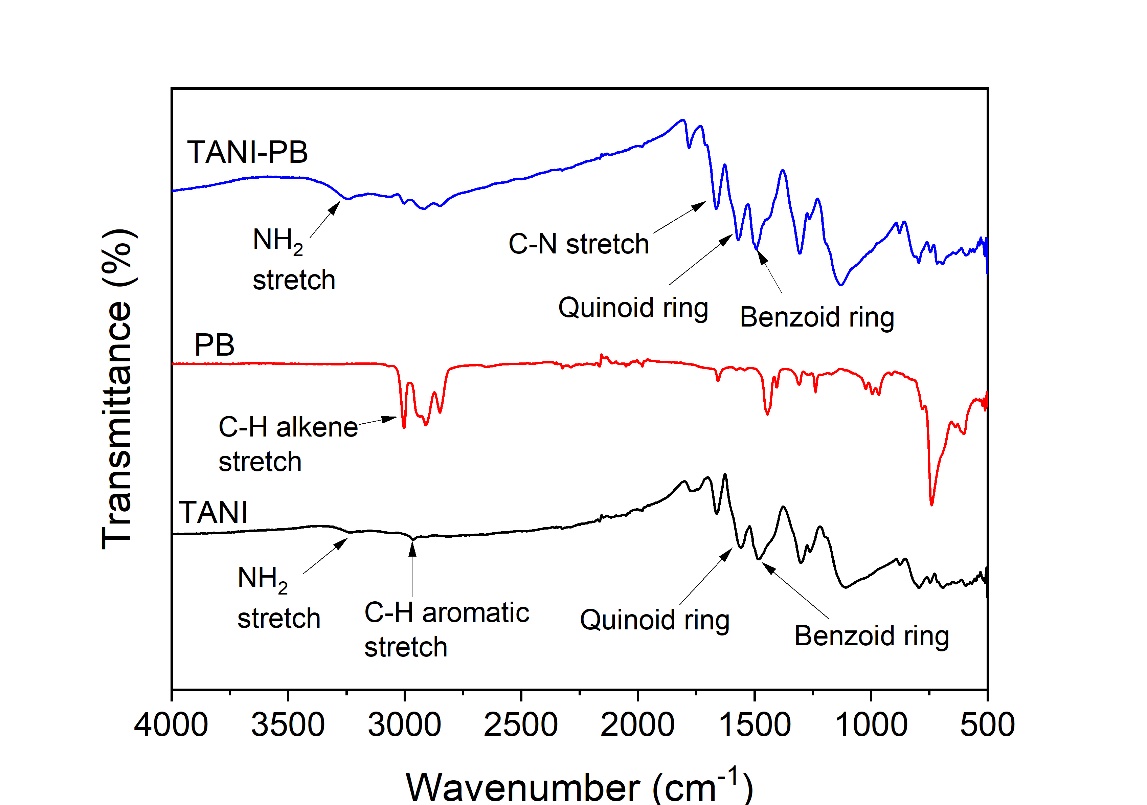


**Figure S4.** FTIR of TANI, PB and TANI-PB with notable peaks highlighted.


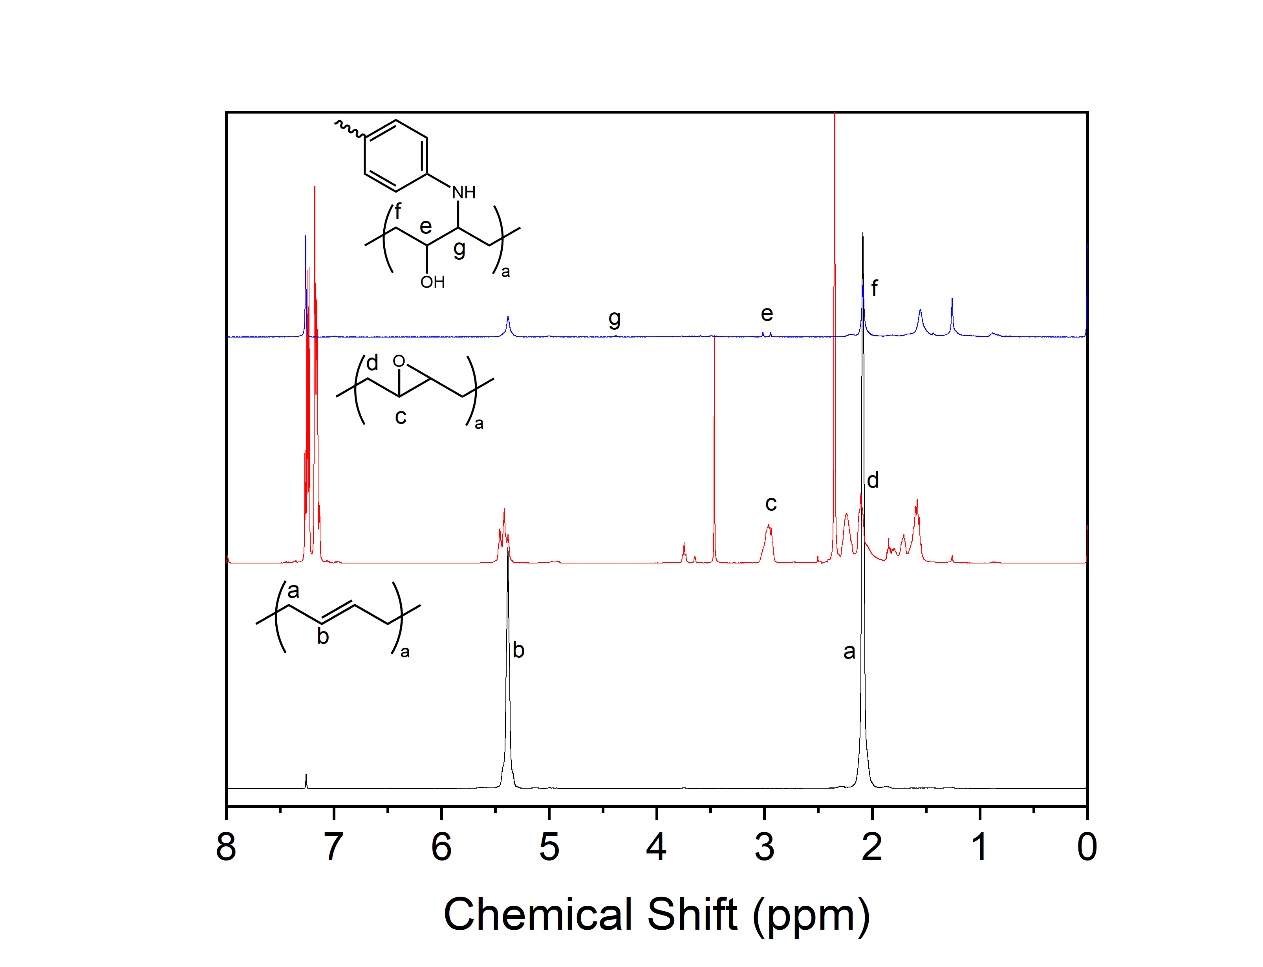


**Figure S5.** 1H NMR of PB, e-PB and TANI-PB with notable peaks assigned.


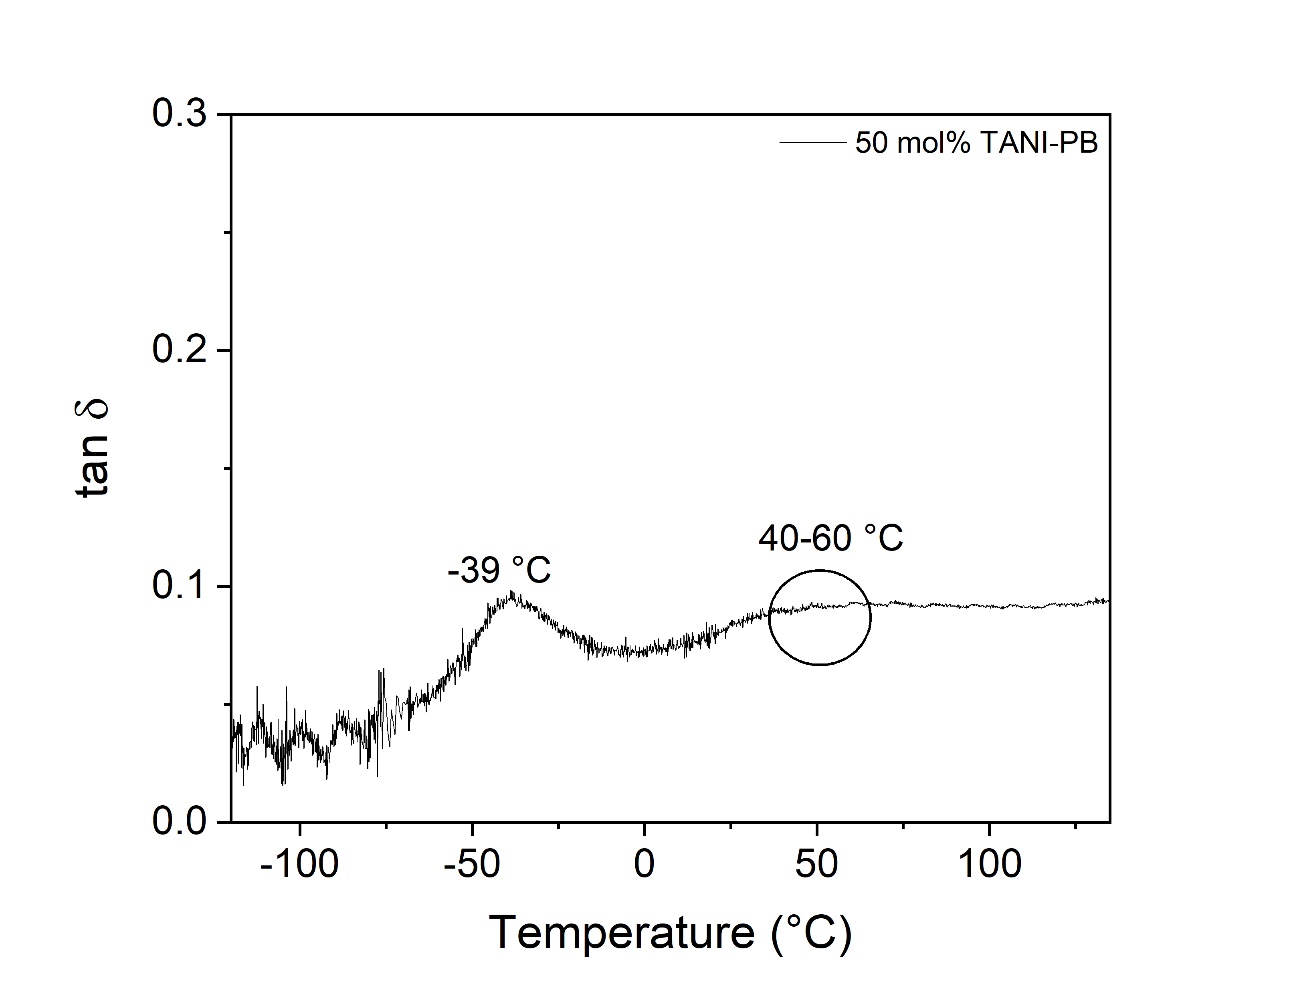


**Figure S6.** DMTA of 50 mol% TANI-PB with Tg transition peaks highlighted.


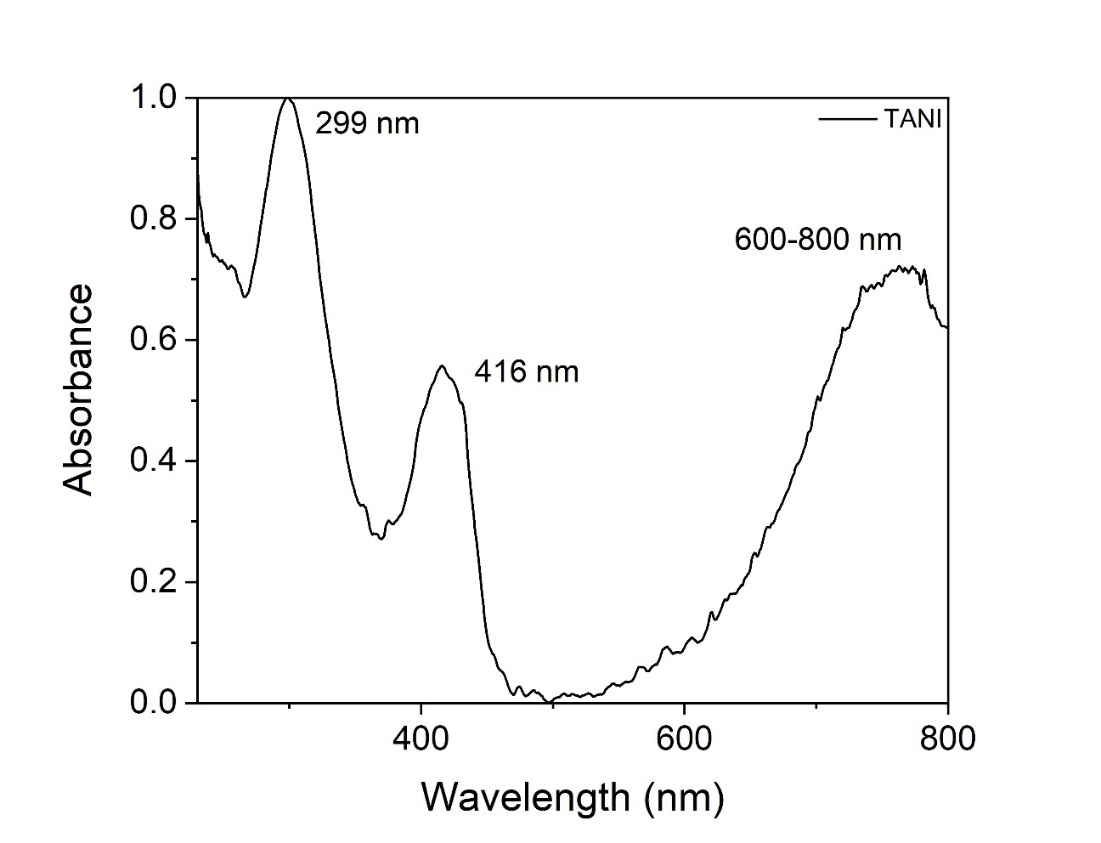


**Figure S7.** UV-Vis spectroscopy of TANI.


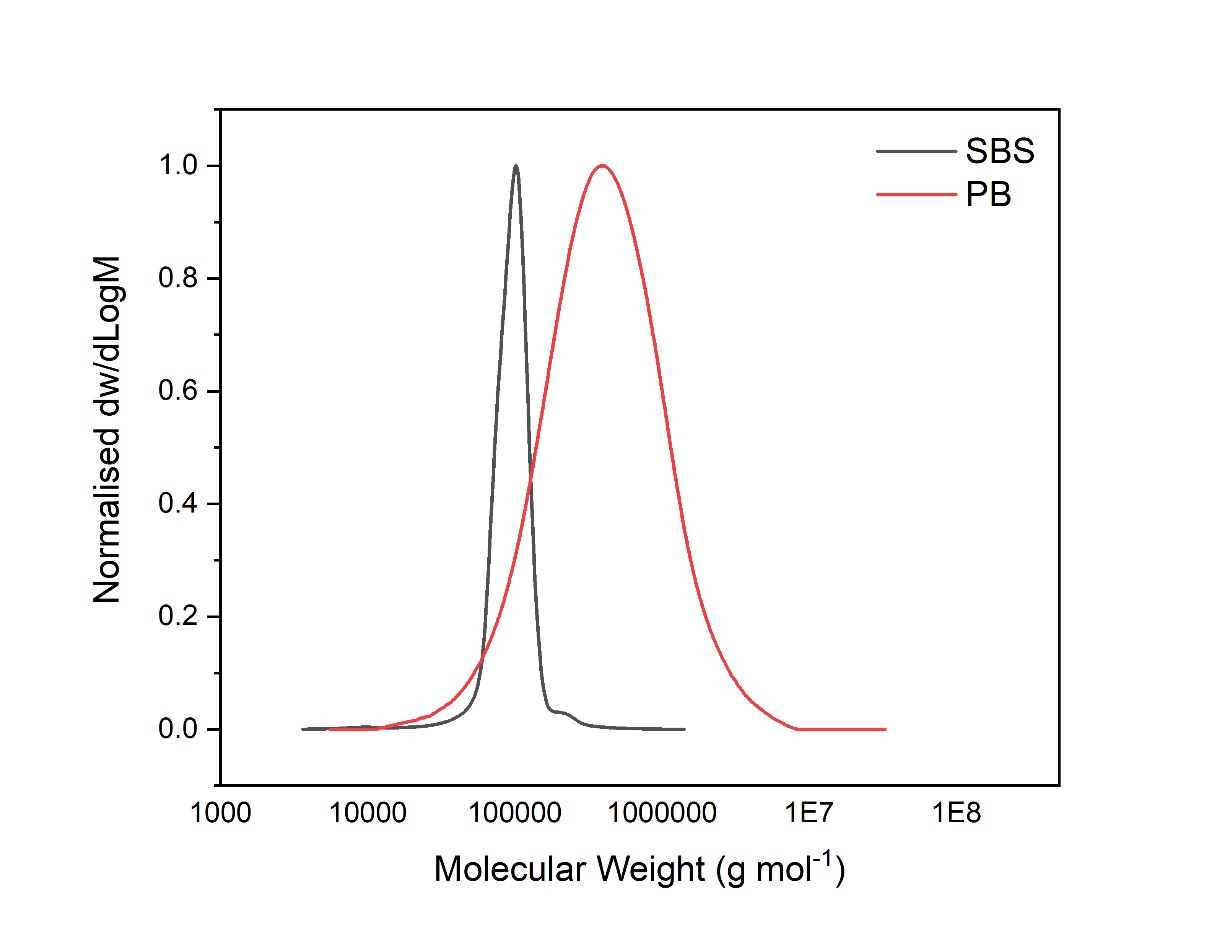


**Figure S8.** GPC trace of SBS and PB.


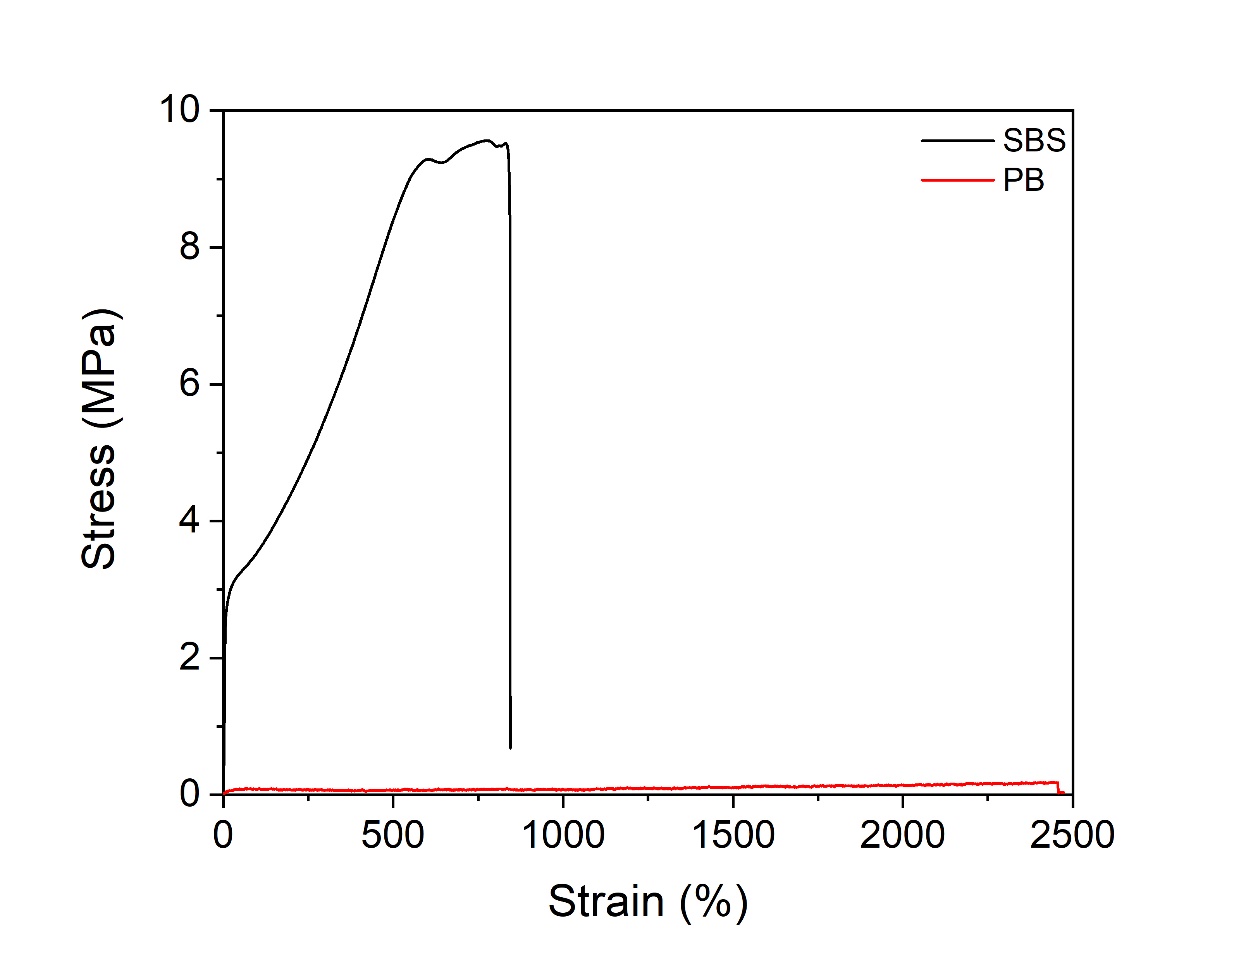


**Figure S9.** Stress strain curve of SBS and PB.


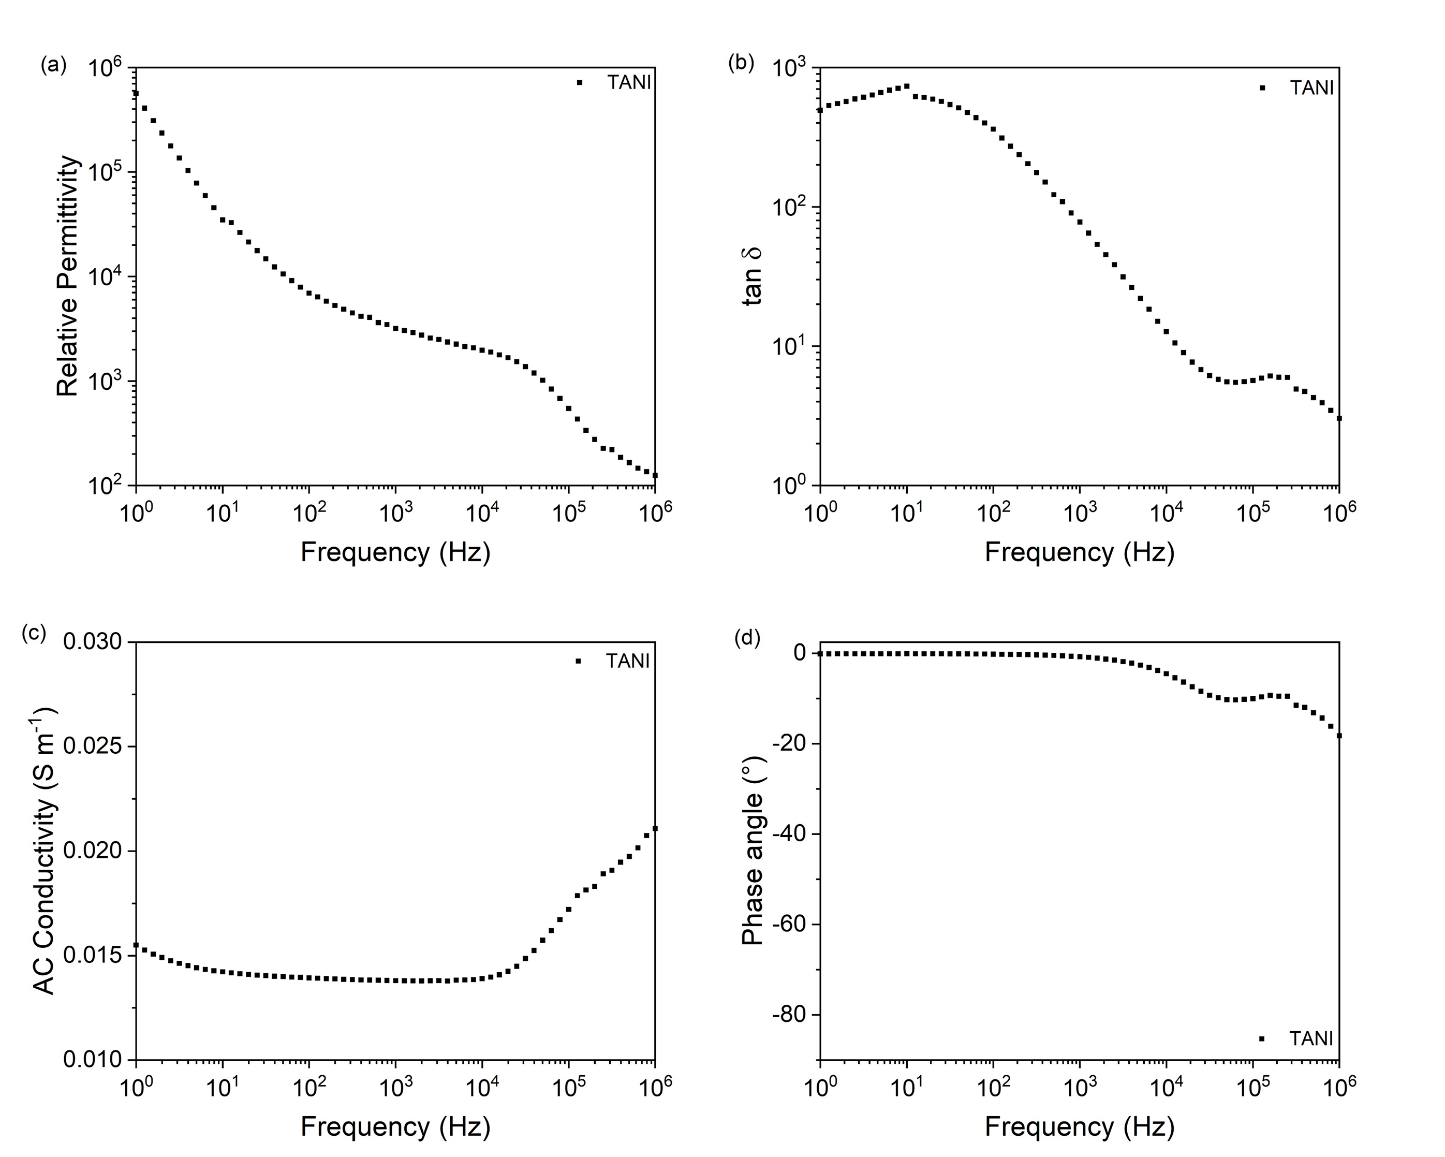


**Figure S10.** (a) relative permittivity, (b) tan δ, (c) AC Conductivity and (d) phase angle for TANI in the emeraldine salt oxidation state.


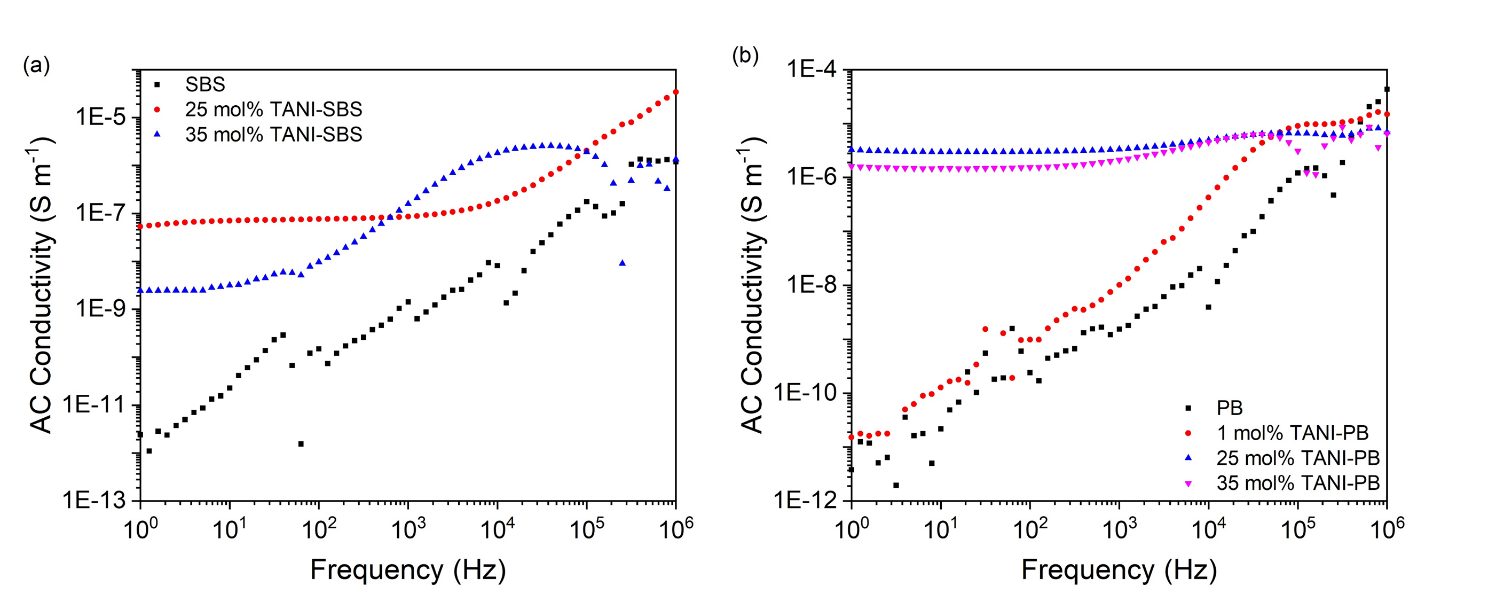


**Figure S11.** AC Conductivity of (a) SBS, 25 mol% TANI-SBS and 35 mol% TANI-SBS and (b) PB, 1 mol% TANI-PB, 25 mol% TANI-PB and 35 mol% TANI-PB.
